# Supplementary material for: Effects of dietary beef, pork, chicken and salmon on intestinal carcinogenesis in A/J Min/+ mice
Source: PubMed Central journal article supplement (PMC5398569; doi:10.1371/journal.pone.0176001), 2017-04-20
Supplement: pone.0176001.s001.pdf [file pone.0176001.s001.pdf]

S1 Table: Fatty acid composition of the experimental diets.

|                                           | Powder-based muscle food diets |                 |             |             |             |             | Reference diet |
|-------------------------------------------|--------------------------------|-----------------|-------------|-------------|-------------|-------------|----------------|
|                                           | Salmon                         | Chicken Low Fat | Chicken     | Pork        | Beef        | Beef n-6    | RM1            |
| <b>% of total fatty acids<sup>a</sup></b> |                                |                 |             |             |             |             |                |
| <b>C14:0</b>                              | 2.2                            | 1.2             | 0.8         | 1.5         | 3.1         | 2.2         | 5.2            |
| <b>C16:0</b>                              | 8.8                            | 23.2            | 21.2        | 22.0        | 23.6        | 19.1        | 11.4           |
| <b>C16:1<sub>n-7</sub></b>                | 2.5                            | 4.2             | 4.2         | 2.3         | 2.9         | 2.1         | 3.3            |
| <b>C18:0</b>                              | 2.4                            | 6.6             | 6.0         | 10.5        | 21.0        | 16.0        | 1.5            |
| <b>C18:1<sub>n-9</sub></b>                | 42.9                           | 39.6            | 40.1        | 43.6        | 36.1        | 31.4        | 28.4           |
| <b>C18:2<sub>n-6</sub></b>                | 13.4                           | 17.6            | 21.2        | 12.8        | 2.5         | 19.9        | 25.5           |
| <b>C18:3<sub>n-3</sub></b>                | 4.8                            | 1.7             | 2.1         | 1.4         | 0.8         | 0.5         | 2.2            |
| <b>C18:4<sub>n-3</sub></b>                | 0.6                            | -               | -           | -           | -           | -           | -              |
| <b>C20:1<sub>n-9</sub></b>                | 3.7                            | 0.4             | 0.4         | 0.9         | 0.2         | 0.2         | -              |
| <b>C20:4<sub>n-6</sub></b>                | 0.3                            | 0.6             | 0.4         | 0.4         | 0.1         | 0.1         | -              |
| <b>C20:5<sub>n-3</sub></b>                | 2.6                            | -               | -           | -           | -           | -           | -              |
| <b>C22:5<sub>n-3</sub></b>                | 1.6                            | 0.2             | -           | 0.2         | 0.1         | 0.1         | -              |
| <b>C22:6<sub>n-3</sub></b>                | 3.9                            | 0.2             | -           | 0.1         | -           | -           | -              |
| <b>DB<sup>b</sup></b>                     | <b>138.3</b>                   | <b>89.1</b>     | <b>95.0</b> | <b>79.8</b> | <b>47.5</b> | <b>75.9</b> | <b>89.3</b>    |

<sup>a</sup>Analyses performed by Eurofins Food & Agro Testing AS (Moss, Norway): fatty acid composition [1]

<sup>b</sup>DB is the relative number of double bonds per g fat, and was calculated by the formula:

$$DB = \sum_{n=1}^6 n (\% \text{ fatty acids with } n \text{ double bonds})$$

- Ottestad I, Vogt G, Retterstøl K, Myhrstad MC, Haugen J-E, Nilsson A, et al. Oxidised fish oil does not influence established markers of oxidative stress in healthy human subjects: a randomised controlled trial. Br J Nutr. 2012 Jul;108(2):315–26.
