# Supplementary material for: Effects of dietary beef, pork, chicken and salmon on intestinal carcinogenesis in A/J Min/+ mice
Source: PubMed Central journal article supplement (PMC5398569; doi:10.1371/journal.pone.0176001), 2017-04-20
Supplement: pone.0176001.s002.pdf [file pone.0176001.s002.pdf]

**S2 Table: Ingredients of the powder diet and RM1.**

| <b>Powdered diet</b>                        | <b>RM1</b>                       |
|---------------------------------------------|----------------------------------|
| Rice Starch                                 | Wheat                            |
| Sucrose                                     | Barley                           |
| Casein                                      | Wheat feed                       |
| AIN-93G-MX, adjusted for Ca and P           | De-hulled extracted Toasted Soya |
| Cellulose                                   | Soya Protein Concentrate         |
| AIN-93-VX, without supplementary vitamin D3 | Macro Minerals                   |
| L-Cystine                                   | Soya Oil                         |
| Choline Bitartrate                          | Whey powder                      |
|                                             | Amino Acids                      |
|                                             | Vitamins                         |
|                                             | Micro Minerals                   |
