# Supplementary material for: Effects of dietary beef, pork, chicken and salmon on intestinal carcinogenesis in A/J Min/+ mice
Source: PubMed Central journal article supplement (PMC5398569; doi:10.1371/journal.pone.0176001), 2017-04-20
Supplement: pone.0176001.s003.pdf [file pone.0176001.s003.pdf]

**S3 Table: Composition of the powder diet.**

|                                             | <b>Powder diet</b> |
|---------------------------------------------|--------------------|
| Energy (MJ/kg)                              | 14.7               |
| Fat (g/100 g)                               | 0.0                |
| Protein (g/100 g)                           | 18.3               |
| Sugar as glucose after hydrolysis (g/100 g) | 64.6               |
| Fiber (g/100 g)                             | 2.0                |
| adjusted mineral/vitamin level              |                    |
| total Ca (%)                                | 0.08               |
| total P (%)                                 | 0.14               |
| total Vit D3 (iu/100 g) <sup>a</sup>        | <18.3              |

<sup>a</sup>vitamin D from casein (<100 iu/kg casein)
